# Supplementary material for: Accuracy Assessment, Comparative Performance, and Enhancement of Public Domain Digital Elevation Models (ASTER 30 m, SRTM 30 m, CARTOSAT 30 m, SRTM 90 m, MERIT 90 m, and TanDEM-X 90 m) Using DGPS
Source: MDPI journal article supplement (doi:10.3390/rs14061334), 2022-03-09
Supplement: s1 [file s1]

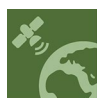

## Supplementary Tables

Table S1. Abbreviations used in the present study.

| Sl.no.                                                                                                  | Abbreviation                             | Full Form                                 |                                                        |
|---------------------------------------------------------------------------------------------------------|------------------------------------------|-------------------------------------------|--------------------------------------------------------|
| Elevation Data Sets derived from Satellites/Space based platforms                                       | Ast30                                    | ASTER GDEM V3 at 30m grid resolution      |                                                        |
|                                                                                                         | Crt30                                    | CARTOSAT V3 R1 at 30m grid resolution     |                                                        |
|                                                                                                         | Srt30                                    | SRTM V3 at 30 m grid resolution           |                                                        |
|                                                                                                         | Srt90                                    | SRTM V4.1 at 90m grid resolution          |                                                        |
|                                                                                                         | MRT90                                    | MERIT global DEM at 90m grid resolution   |                                                        |
|                                                                                                         | TDX90                                    | TanDEM-X DEM at 90m grid size             |                                                        |
| Ground-based equipment                                                                                  | DGPS                                     | Differential Global Positioning System    |                                                        |
|                                                                                                         | MobileGPS                                | GPS chip in Android OS based mobile       |                                                        |
| Elevation Range measured by Ground-based Equipment                                                      | D                                        | Elevation range measured by DGPS          |                                                        |
|                                                                                                         | M                                        | Elevation range measured by Android phone |                                                        |
| Observation station points                                                                              | GCP                                      | Ground control point                      |                                                        |
| Difference in values of geospatial co-ordinate of GCPs observed by DGPS and Android phone (DGPS-MOBILE) | $\Delta X$                               | Mean difference in Easting value          |                                                        |
|                                                                                                         | $\Delta Y$                               | Mean difference in Northing value         |                                                        |
|                                                                                                         | $\Delta Z$                               | Mean difference in Elevation value        |                                                        |
| Interpolation methods used for DEM resampling                                                           | nn                                       | Nearest Neighbour                         |                                                        |
|                                                                                                         | bl                                       | Bilinear                                  |                                                        |
|                                                                                                         | bc                                       | Bicubic                                   |                                                        |
| 7.                                                                                                      | Original or uncorrected elevation data   | u                                         | Uncorrected space borne elevation data sampled at GCPs |
|                                                                                                         | Corrected elevation data                 | c                                         | Corrected space borne elevation data sampled at GCPs   |
| 8.                                                                                                      | Statistical Parameters                   | RMSE                                      | Root Mean Square error,                                |
|                                                                                                         |                                          | MBE                                       | Mean Bias Error                                        |
|                                                                                                         |                                          | RSD                                       | Relative Standard Deviation                            |
|                                                                                                         |                                          | SD                                        | Standard Deviation                                     |
|                                                                                                         |                                          | SE                                        | Standard Error                                         |
| 9.                                                                                                      | Statistic using LINEST function of Excel | r <sup>2</sup>                            | Co-efficient of Determination                          |
|                                                                                                         |                                          | se(y)                                     | Standard error of y-estimate                           |
|                                                                                                         |                                          | m                                         | Slope                                                  |
|                                                                                                         |                                          | se(m)                                     | Standard error of slope                                |
|                                                                                                         |                                          | C                                         | Intercept                                              |
|                                                                                                         |                                          | se(C)                                     | Standard error of intercept                            |

Table S2. Correlation, established using Microsoft excel LINEST function, between estimates of elevation from ground-based equipment (DGPS) versus estimates of elevation from Android OS based MobileGPS at GCPs.

| Linear Regression (DGPS Vs MobileGPS) |       |      |       |       |       |
|---------------------------------------|-------|------|-------|-------|-------|
| r <sup>2</sup> (%)                    | se(y) | m    | se(m) | b     | se(b) |
| 17.45                                 | 8.70  | 0.68 | 0.12  | 76.54 | 30.30 |

Table S3. Results of two tail paired t-test for mean of elevation (Z) values (at 99% CL &  $\alpha = 0.01$ ) carried out taking pairs of elevation values over “uncorrected (u)”, and “corrected (c)” DEM rasters. Pairs are further grouped by the extraction of DEM values using three interpolation methods; nn, bl, and bc at GCPs.

| DEM<br>u Vs c | Pair Name (Elevation) | $\bar{X}$ | S <sup>2</sup> | N   | df  | t Stat  | p-value | t Critical | H <sub>1</sub> :<br>$\mu_d \neq 0$ |
|---------------|-----------------------|-----------|----------------|-----|-----|---------|---------|------------|------------------------------------|
| Ast30         | u.Ast30.nn            | 250.37    | 70.80          | 145 | 144 | 51.82   | <0.001  | 2.61       | T                                  |
|               | c.Ast30.nn            | 244.46    | 49.58          | 145 |     |         |         |            |                                    |
|               | u.Ast30.bl            | 250.29    | 68.02          | 145 | 144 | 50.90   | <0.001  | 2.61       | T                                  |
|               | c.Ast30.bl            | 244.51    | 47.32          | 145 |     |         |         |            |                                    |
|               | u.Ast30.bc            | 250.28    | 69.16          | 145 | 144 | 51.75   | <0.001  | 2.61       | T                                  |
|               | c.Ast30.bc            | 244.42    | 48.35          | 145 |     |         |         |            |                                    |
| Crt30         | u.Crt30.nn            | 249.78    | 38.41          | 145 | 144 | 161.60  | <0.001  | 2.61       | T                                  |
|               | c.Crt30.nn            | 244.40    | 43.53          | 145 |     |         |         |            |                                    |
|               | u.Crt30.bl            | 249.69    | 36.49          | 145 | 144 | 180.31  | <0.001  | 2.61       | T                                  |
|               | c.Crt30.bl            | 244.40    | 40.89          | 145 |     |         |         |            |                                    |
|               | u.Crt30.bc            | 249.65    | 37.16          | 145 | 144 | 175.34  | <0.001  | 2.61       | T                                  |
|               | c.Crt30.bc            | 244.42    | 41.68          | 145 |     |         |         |            |                                    |
| Srt30         | u.Srt30.nn            | 249.21    | 42.16          | 145 | 144 | 220.13  | <0.001  | 2.61       | T                                  |
|               | c.Srt30.nn            | 244.43    | 38.83          | 145 |     |         |         |            |                                    |
|               | u.Srt30.bl            | 249.23    | 40.88          | 145 | 144 | 292.89  | <0.001  | 2.61       | T                                  |
|               | c.Srt30.bl            | 244.41    | 38.38          | 145 |     |         |         |            |                                    |
|               | u.Srt30.bc            | 249.24    | 41.40          | 145 | 144 | 222.16  | <0.001  | 2.61       | T                                  |
|               | c.Srt30.bc            | 244.45    | 38.13          | 145 |     |         |         |            |                                    |
| Srt90         | u.Srt90.nn            | 249.23    | 40.94          | 145 | 144 | 362.70  | <0.001  | 2.61       | T                                  |
|               | c.Srt90.nn            | 244.34    | 38.89          | 145 |     |         |         |            |                                    |
|               | u.Srt90.bl            | 249.23    | 38.28          | 145 | 144 | 1845.43 | <0.001  | 2.61       | T                                  |
|               | c.Srt90.bl            | 244.51    | 37.90          | 145 |     |         |         |            |                                    |
|               | u.Srt90.bc            | 249.27    | 39.84          | 145 | 144 | 399.24  | <0.001  | 2.61       | T                                  |
|               | c.Srt90.bc            | 244.37    | 38.00          | 145 |     |         |         |            |                                    |
| MRT90         | u.MRT90.nn            | 248.40    | 38.26          | 145 | 144 | 820.32  | <0.001  | 2.61       | T                                  |
|               | c.MRT90.nn            | 244.40    | 38.99          | 145 |     |         |         |            |                                    |
|               | u.MRT90.bl            | 248.40    | 36.17          | 145 | 144 | 299.70  | <0.001  | 2.61       | T                                  |
|               | c.MRT90.bl            | 244.40    | 38.12          | 145 |     |         |         |            |                                    |
|               | u.MRT90.bc            | 248.44    | 37.48          | 145 | 144 | 854.99  | <0.001  | 2.61       | T                                  |
|               | c.MRT90.bc            | 244.40    | 38.18          | 145 |     |         |         |            |                                    |
| TDX90         | u.TDX90.nn            | 248.03    | 43.33          | 145 | 144 | 145.18  | <0.001  | 2.61       | T                                  |
|               | c.TDX90.nn            | 244.39    | 39.45          | 145 |     |         |         |            |                                    |
|               | u.TDX90.bl            | 248.06    | 40.21          | 145 | 144 | 253.22  | <0.001  | 2.61       | T                                  |
|               | c.TDX90.bl            | 244.43    | 38.05          | 145 |     |         |         |            |                                    |
|               | u.TDX90.bc            | 248.09    | 42.12          | 145 | 144 | 149.39  | <0.001  | 2.61       | T                                  |
|               | c.TDX90.bc            | 244.41    | 38.35          | 145 |     |         |         |            |                                    |

Null Hypothesis: H<sub>0</sub>:  $\mu_d = 0$ ; Alternative Hypothesis: H<sub>1</sub>:  $\mu_d \neq 0$ .

Where,  $\mu_d$  = hypothesized mean difference, Ast30 = ASTER GDEM V3, Crt30 = CartoDEM v3.R1, Srt30 = SRTM.v3, Srt90 = SRTM.v4.1, MRT90= MERIT DEM, TDX90=TanDEM-X 90m,  $\bar{X}$  = mean, S<sup>2</sup> = variance, N= No. of observations, df = degree of freedom, t Stat= t-statistic, t Critical = critical value of two tail paired t-Test, p-value = two tail probability distribution for paired t-Test, CL = Confidence Level,  $\alpha$  = level of significance, T= True, F= False.

**Table S4.** Results of two tail F-test for variances of elevation values (at 99% CL &  $\alpha = 0.01$ ), carried out taking pairs of elevation values sampled over “uncorrected (u)”, and “corrected (c)” DEM rasters. Pairs are further grouped by the extraction of DEM values using three interpolation methods; nn, bl, and bc at GCPs.

| DEM<br>u Vs c | Pair Name (Elevation) | $\bar{X}$ | S <sup>2</sup> | N | df | F-stat | p-value | CI | H <sub>1</sub> : $\sigma_1^2 \neq \sigma_2^2$ |
|---------------|-----------------------|-----------|----------------|---|----|--------|---------|----|-----------------------------------------------|
|---------------|-----------------------|-----------|----------------|---|----|--------|---------|----|-----------------------------------------------|

|       |            |        |       |     |     |       |       |                 |   |
|-------|------------|--------|-------|-----|-----|-------|-------|-----------------|---|
| Ast30 | u.Ast30.nn | 250.37 | 70.80 | 145 | 144 | 1.428 | 0.033 | (0.6494,1.5399) | F |
|       | c.Ast30.nn | 244.46 | 49.58 | 145 |     |       |       |                 |   |
|       | u.Ast30.bl | 250.29 | 68.02 | 145 | 144 | 1.438 | 0.030 | (0.6494,1.5399) | F |
|       | c.Ast30.bl | 244.51 | 47.32 | 145 |     |       |       |                 |   |
|       | u.Ast30.bc | 250.28 | 69.16 | 145 | 144 | 1.430 | 0.032 | (0.6494,1.5399) | F |
|       | c.Ast30.bc | 244.42 | 48.35 | 145 |     |       |       |                 |   |
| Crt30 | u.Crt30.nn | 249.78 | 38.41 | 145 | 144 | 1.133 | 0.453 | (0.6494,1.5399) | F |
|       | c.Crt30.nn | 244.40 | 43.53 | 145 |     |       |       |                 |   |
|       | u.Crt30.bl | 249.69 | 36.49 | 145 | 144 | 1.121 | 0.496 | (0.6494,1.5399) | F |
|       | c.Crt30.bl | 244.40 | 40.89 | 145 |     |       |       |                 |   |
|       | u.Crt30.bc | 249.65 | 37.16 | 145 | 144 | 1.121 | 0.492 | (0.6494,1.5399) | F |
|       | c.Crt30.bc | 244.42 | 41.68 | 145 |     |       |       |                 |   |
| Srt30 | u.Srt30.nn | 249.21 | 42.16 | 145 | 144 | 1.086 | 0.622 | (0.6494,1.5399) | F |
|       | c.Srt30.nn | 244.43 | 38.83 | 145 |     |       |       |                 |   |
|       | u.Srt30.bl | 249.23 | 40.88 | 145 | 144 | 1.065 | 0.706 | (0.6494,1.5399) | F |
|       | c.Srt30.bl | 244.41 | 38.38 | 145 |     |       |       |                 |   |
|       | u.Srt30.bc | 249.24 | 41.40 | 145 | 144 | 1.086 | 0.622 | (0.6494,1.5399) | F |
|       | c.Srt30.bc | 244.45 | 38.13 | 145 |     |       |       |                 |   |
| Srt90 | u.Srt90.nn | 249.23 | 40.94 | 145 | 144 | 1.053 | 0.758 | (0.6494,1.5399) | F |
|       | c.Srt90.nn | 244.34 | 38.89 | 145 |     |       |       |                 |   |
|       | u.Srt90.bl | 249.23 | 38.28 | 145 | 144 | 1.010 | 0.952 | (0.6494,1.5399) | F |
|       | c.Srt90.bl | 244.51 | 37.90 | 145 |     |       |       |                 |   |
|       | u.Srt90.bc | 249.27 | 39.84 | 145 | 144 | 1.049 | 0.776 | (0.6494,1.5399) | F |
|       | c.Srt90.bc | 244.37 | 38.00 | 145 |     |       |       |                 |   |
| MRT90 | u.MRT90.nn | 248.40 | 38.26 | 145 | 144 | 1.019 | 0.910 | (0.6494,1.5399) | F |
|       | c.MRT90.nn | 244.40 | 38.99 | 145 |     |       |       |                 |   |
|       | u.MRT90.bl | 248.40 | 36.17 | 145 | 144 | 1.054 | 0.752 | (0.6494,1.5399) | F |
|       | c.MRT90.bl | 244.40 | 38.12 | 145 |     |       |       |                 |   |
|       | u.MRT90.bc | 248.44 | 37.48 | 145 | 144 | 1.019 | 0.912 | (0.6494,1.5399) | F |
|       | c.MRT90.bc | 244.40 | 38.18 | 145 |     |       |       |                 |   |
| TDX90 | u.TDX90.nn | 248.03 | 43.33 | 145 | 144 | 1.098 | 0.574 | (0.6494,1.5399) | F |
|       | c.TDX90.nn | 244.39 | 39.45 | 145 |     |       |       |                 |   |
|       | u.TDX90.bl | 248.06 | 40.21 | 145 | 144 | 1.057 | 0.741 | (0.6494,1.5399) | F |
|       | c.TDX90.bl | 244.43 | 38.05 | 145 |     |       |       |                 |   |
|       | u.TDX90.bc | 248.09 | 42.12 | 145 | 144 | 1.098 | 0.574 | (0.6494,1.5399) | F |
|       | c.TDX90.bc | 244.41 | 38.35 | 145 |     |       |       |                 |   |

Null Hypothesis:  $H_0: \sigma_1^2 = \sigma_2^2$ ; Alternative Hypothesis:  $H_1: \sigma_1^2 \neq \sigma_2^2$

Where,  $\sigma_1^2$ = variance for 1st population, and  $\sigma_2^2$ = variance for 2nd population, Ast30 = ASTER GDEM V3, Crt30 = CartoDEM v3.R1, Srt30 = SRTM.v3, Srt90 = SRTM.v4.1, MRT90= MERIT DEM, TDX90=TanDEM-X 90m,  $\bar{X}$  = mean, S2 = sample variance, N= No. of observations, df = degree of freedom, Fstat = F-statistic, p-value = probability distribution for two-tail F-Test, CI = Confidence Interval, CL = Confidence Level,  $\alpha$  = level of significance, T= True, F= False.

**Table S5.** Results of two tail F-test for variances (at 99% CL &  $\alpha = 0.01$ ), carried out taking pairs of elevation values observed by “DGPS” and sampled over “uncorrected (u)” DEM rasters where values were extracted by three interpolation methods; nearest neighbour (nn) , bilinear (bl) and bicubic (bc) at GCPs.

| DEM(u) Vs DGPS | Pair Name (Elevation) | $\bar{X}$ | S2    | N   | df  | t Stat | p-value | CI              | $H_1: \sigma_1^2 \neq \sigma_2^2$ |
|----------------|-----------------------|-----------|-------|-----|-----|--------|---------|-----------------|-----------------------------------|
| Ast30          | u.Ast30.nn            | 250.37    | 70.80 | 145 | 144 | 2.070  | <0.001  | (0.6494,1.5399) | T                                 |
|                | DGPS                  | 244.41    | 34.21 | 145 |     |        |         |                 |                                   |

|       |            |        |       |     |     |       |        |                 |   |
|-------|------------|--------|-------|-----|-----|-------|--------|-----------------|---|
|       | u.Ast30.bl | 250.29 | 68.02 | 145 | 144 | 1.989 | <0.001 | (0.6494,1.5399) | T |
|       | DGPS       | 244.41 | 34.21 | 145 |     |       |        |                 |   |
|       | u.Ast30.bc | 250.28 | 69.16 | 145 | 144 | 2.022 | <0.001 | (0.6494,1.5399) | T |
|       | DGPS       | 244.41 | 34.21 | 145 |     |       |        |                 |   |
| Crt30 | u.Crt30.nn | 249.78 | 38.41 | 145 | 144 | 1.123 | 0.488  | (0.6494,1.5399) | F |
|       | DGPS       | 244.41 | 34.21 | 145 |     |       |        |                 |   |
|       | u.Crt30.bl | 249.69 | 36.49 | 145 | 144 | 1.067 | 0.699  | (0.6494,1.5399) | F |
|       | DGPS       | 244.41 | 34.21 | 145 |     |       |        |                 |   |
|       | u.Crt30.bc | 249.65 | 37.16 | 145 | 144 | 1.086 | 0.620  | (0.6494,1.5399) | F |
|       | DGPS       | 244.41 | 34.21 | 145 |     |       |        |                 |   |
| Srt30 | u.Srt30.nn | 249.21 | 42.16 | 145 | 144 | 1.232 | 0.211  | (0.6494,1.5399) | F |
|       | DGPS       | 244.41 | 34.21 | 145 |     |       |        |                 |   |
|       | u.Srt30.bl | 249.23 | 40.88 | 145 | 144 | 1.195 | 0.286  | (0.6494,1.5399) | F |
|       | DGPS       | 244.41 | 34.21 | 145 |     |       |        |                 |   |
|       | u.Srt30.bc | 249.24 | 41.40 | 145 | 144 | 1.210 | 0.253  | (0.6494,1.5399) | F |
|       | DGPS       | 244.41 | 34.21 | 145 |     |       |        |                 |   |
| Srt90 | u.Srt90.nn | 249.23 | 40.94 | 145 | 144 | 1.197 | 0.282  | (0.6494,1.5399) | F |
|       | DGPS       | 244.41 | 34.21 | 145 |     |       |        |                 |   |
|       | u.Srt90.bl | 249.23 | 38.28 | 145 | 144 | 1.119 | 0.500  | (0.6494,1.5399) | F |
|       | DGPS       | 244.41 | 34.21 | 145 |     |       |        |                 |   |
|       | u.Srt90.bc | 249.27 | 39.84 | 145 | 144 | 1.165 | 0.361  | (0.6494,1.5399) | F |
|       | DGPS       | 244.41 | 34.21 | 145 |     |       |        |                 |   |
| MRT90 | u.MRT90.nn | 248.40 | 38.26 | 145 | 144 | 1.119 | 0.502  | (0.6494,1.5399) | F |
|       | DGPS       | 244.41 | 34.21 | 145 |     |       |        |                 |   |
|       | u.MRT90.bl | 248.40 | 36.17 | 145 | 144 | 1.057 | 0.738  | (0.6494,1.5399) | F |
|       | DGPS       | 244.41 | 34.21 | 145 |     |       |        |                 |   |
|       | u.MRT90.bc | 248.44 | 37.48 | 145 | 144 | 1.096 | 0.584  | (0.6494,1.5399) | F |
|       | DGPS       | 244.41 | 34.21 | 145 |     |       |        |                 |   |
| TDX90 | u.TDX90.nn | 248.03 | 43.33 | 145 | 144 | 1.267 | 0.157  | (0.6494,1.5399) | F |
|       | DGPS       | 244.41 | 34.21 | 145 |     |       |        |                 |   |
|       | u.TDX90.bl | 248.06 | 40.21 | 145 | 144 | 1.176 | 0.333  | (0.6494,1.5399) | F |
|       | DGPS       | 244.41 | 34.21 | 145 |     |       |        |                 |   |
|       | u.TDX90.bc | 248.09 | 42.12 | 145 | 144 | 1.231 | 0.213  | (0.6494,1.5399) | F |
|       | DGPS       | 244.41 | 34.21 | 145 |     |       |        |                 |   |

Null Hypothesis:  $H_0: \sigma_1^2 = \sigma_2^2$ ; Alternative Hypothesis:  $H_1: \sigma_1^2 \neq \sigma_2^2$

Where,  $\sigma_1^2$  = variance for 1st population, and  $\sigma_2^2$  = variance for 2nd population, Ast30 = ASTER GDEM V3, Crt30 = CartoDEM v3.R1, Srt30 = SRTM.v3, Srt90 = SRTM.v4.1, MRT90 = MERIT DEM, TDX90 = TanDEM-X 90m,  $\bar{X}$  = mean, S2 = sample variance, N = No. of observations, df = degree of freedom, Fstat = F-statistic, p-value = probability distribution for two-tail F-Test, CI = Confidence Interval, CL = Confidence Level,  $\alpha$  = level of significance, T = True, F = False

**Table S6.** Results of two tail F-test for variances of elevation (Z) (at 99% CL &  $\alpha = 0.01$ ), carried out taking pairs of elevation values observed by “DGPS” and sampled over “corrected (c)” DEM rasters where values were extracted by three interpolation methods; nearest neighbour (nn), bilinear (bl) and bicubic (bc) at GCPs.

| DEM (c)<br>Vs DGPS | Pair Name (Elevation) | $\bar{X}$ | S2       | N   | df  | F-stat | p-value | CI              | $H_1: \sigma_1^2 \neq \sigma_2^2$ |
|--------------------|-----------------------|-----------|----------|-----|-----|--------|---------|-----------------|-----------------------------------|
| Ast30              | c.Ast30.nn            | 244.4565  | 49.58104 | 145 | 144 | 1.45   | 0.027   | (0.6494,1.5399) | F                                 |
|                    | DGPS                  | 244.4062  | 34.20564 | 145 |     |        |         |                 |                                   |
|                    | c.Ast30.bl            | 244.5058  | 47.31647 | 145 | 144 | 1.38   | 0.052   | (0.6494,1.5399) | F                                 |
|                    | DGPS                  | 244.4062  | 34.20564 | 145 |     |        |         |                 |                                   |

|       |            |          |          |     |     |      |       |                 |   |
|-------|------------|----------|----------|-----|-----|------|-------|-----------------|---|
|       | c.Ast30.bc | 244.4203 | 48.34629 | 145 | 144 | 1.41 | 0.039 | (0.6494,1.5399) | F |
|       | DGPS       | 244.4062 | 34.20564 | 145 |     |      |       |                 |   |
| Crt30 | c.Crt30.nn | 244.4047 | 43.53391 | 145 | 144 | 1.27 | 0.149 | (0.6494,1.5399) | F |
|       | DGPS       | 244.4062 | 34.20564 | 145 |     |      |       |                 |   |
|       | c.Crt30.bl | 244.398  | 40.88627 | 145 | 144 | 1.20 | 0.286 | (0.6494,1.5399) | F |
|       | DGPS       | 244.4062 | 34.20564 | 145 |     |      |       |                 |   |
|       | c.Crt30.bc | 244.4186 | 41.67564 | 145 | 144 | 1.22 | 0.237 | (0.6494,1.5399) | F |
|       | DGPS       | 244.4062 | 34.20564 | 145 |     |      |       |                 |   |
| Srt30 | c.Srt30.nn | 244.4297 | 38.82553 | 145 | 144 | 1.14 | 0.448 | (0.6494,1.5399) | F |
|       | DGPS       | 244.4062 | 34.20564 | 145 |     |      |       |                 |   |
|       | c.Srt30.bl | 244.412  | 38.38389 | 145 | 144 | 1.12 | 0.490 | (0.6494,1.5399) | F |
|       | DGPS       | 244.4062 | 34.20564 | 145 |     |      |       |                 |   |
|       | c.Srt30.bc | 244.4514 | 38.1307  | 145 | 144 | 1.11 | 0.515 | (0.6494,1.5399) | F |
|       | DGPS       | 244.4062 | 34.20564 | 145 |     |      |       |                 |   |
| Srt90 | c.Srt90.nn | 244.3437 | 38.89221 | 145 | 144 | 1.14 | 0.442 | (0.6494,1.5399) | F |
|       | DGPS       | 244.4062 | 34.20564 | 145 |     |      |       |                 |   |
|       | c.Srt90.bl | 244.511  | 37.90234 | 145 | 144 | 1.11 | 0.539 | (0.6494,1.5399) | F |
|       | DGPS       | 244.4062 | 34.20564 | 145 |     |      |       |                 |   |
|       | c.Srt90.bc | 244.3674 | 37.99553 | 145 | 144 | 1.11 | 0.529 | (0.6494,1.5399) | F |
|       | DGPS       | 244.4062 | 34.20564 | 145 |     |      |       |                 |   |
| MRT90 | c.MRT90.nn | 244.3981 | 38.9921  | 145 | 144 | 1.14 | 0.433 | (0.6494,1.5399) | F |
|       | DGPS       | 244.4062 | 34.20564 | 145 |     |      |       |                 |   |
|       | c.MRT90.bl | 244.403  | 38.12473 | 145 | 144 | 1.11 | 0.516 | (0.6494,1.5399) | F |
|       | DGPS       | 244.4062 | 34.20564 | 145 |     |      |       |                 |   |
|       | c.MRT90.bc | 244.4028 | 38.18381 | 145 | 144 | 1.12 | 0.510 | (0.6494,1.5399) | F |
|       | DGPS       | 244.4062 | 34.20564 | 145 |     |      |       |                 |   |
| TDX90 | c.TDX90.nn | 244.3915 | 39.4491  | 145 | 144 | 1.15 | 0.393 | (0.6494,1.5399) | F |
|       | DGPS       | 244.4062 | 34.20564 | 145 |     |      |       |                 |   |
|       | c.TDX90.bl | 244.4283 | 38.04905 | 145 | 144 | 1.11 | 0.524 | (0.6494,1.5399) | F |
|       | DGPS       | 244.4062 | 34.20564 | 145 |     |      |       |                 |   |
|       | c.TDX90.bc | 244.4073 | 38.34761 | 145 | 144 | 1.12 | 0.494 | (0.6494,1.5399) | F |
|       | DGPS       | 244.4062 | 34.20564 | 145 |     |      |       |                 |   |

Null Hypothesis:  $H_0: \sigma_1^2 = \sigma_2^2$ ; Alternative Hypothesis:  $H_1: \sigma_1^2 \neq \sigma_2^2$

Where,  $\sigma_1^2$  = variance for 1st population, and  $\sigma_2^2$  = variance for 2nd population, Ast30 = ASTER GDEM V3, Crt30 = CartoDEM v3.R1, Srt30 = SRTM.v3, Srt90 = SRTM.v4.1, MRT90 = MERIT DEM, TDX90 = TanDEM-X 90m,  $\bar{X}$  = mean,  $S^2$  = sample variance,  $N$  = No. of observations,  $df$  = degree of freedom,  $F_{stat}$  = F-statistic,  $p$ -value = probability distribution for two-tail F-Test,  $CI$  = Confidence Interval,  $CL$  = Confidence Level,  $\alpha$  = level of significance,  $T$  = True,  $F$  = False.

**Table S7.** Results of paired t-test for means of slope values (at 99% CL &  $\alpha = 0.01$ ) carried out taking pairs of slope values over “uncorrected (u)”, and “corrected (c)” DEM Slope rasters at GCPs. Pairs are further grouped by the extraction of slope values using three interpolation methods; nearest neighbour (nn), bilinear (bl), and bicubic (bc) at GCPs.

| Slope of DEMs | Pair Name (slope) | $\bar{X}$ | $S^2$ | N   | df  | t Stat | p-value | t Critical | $H_1: \mu_d \neq 0$ |
|---------------|-------------------|-----------|-------|-----|-----|--------|---------|------------|---------------------|
| Ast30         | u.Ast30           | 5.25      | 6.92  | 145 | 144 | 24.37  | <0.001  | 2.61       | T                   |
|               | c.Ast30.nn        | 4.40      | 4.89  | 145 |     |        |         |            |                     |
|               | u.Ast30           | 5.25      | 6.92  | 145 | 144 | 24.37  | <0.001  | 2.61       | T                   |
|               | c.Ast30.bl        | 4.39      | 4.86  | 145 |     |        |         |            |                     |
|               | u.Ast30           | 5.25      | 6.92  | 145 | 144 | 24.37  | <0.001  | 2.61       | T                   |
|               | c.Ast30.bc        | 4.40      | 4.88  | 145 |     |        |         |            |                     |

|       |            |      |      |     |     |        |        |      |   |
|-------|------------|------|------|-----|-----|--------|--------|------|---|
| Crt30 | u.Crt30    | 3.28 | 3.44 | 145 | 144 | −21.47 | <0.001 | 2.61 | T |
|       | c.Crt30.nn | 3.49 | 3.90 | 145 |     |        |        |      |   |
|       | u.Crt30    | 3.28 | 3.44 | 145 | 144 | −21.47 | <0.001 | 2.61 | T |
|       | c.Crt30.bl | 3.47 | 3.85 | 145 |     |        |        |      |   |
|       | u.Crt30    | 3.28 | 3.44 | 145 | 144 | −21.47 | <0.001 | 2.61 | T |
|       | c.Crt30.bc | 3.47 | 3.86 | 145 |     |        |        |      |   |
| Srt30 | u.Srt30    | 2.72 | 1.62 | 145 | 144 | 25.87  | <0.001 | 2.61 | T |
|       | c.Srt30.nn | 2.62 | 1.49 | 145 |     |        |        |      |   |
|       | u.Srt30    | 2.72 | 1.62 | 145 | 144 | 25.87  | <0.001 | 2.61 | T |
|       | c.Srt30.bl | 2.64 | 1.52 | 145 |     |        |        |      |   |
|       | u.Srt30    | 2.72 | 1.62 | 145 | 144 | 25.87  | <0.001 | 2.61 | T |
|       | c.Srt30.bc | 2.62 | 1.49 | 145 |     |        |        |      |   |
| Srt90 | u.Srt90    | 1.75 | 0.58 | 145 | 144 | 27.55  | <0.001 | 2.61 | T |
|       | c.Srt90.nn | 1.70 | 0.56 | 145 |     |        |        |      |   |
|       | u.Srt90    | 1.75 | 0.58 | 145 | 144 | 27.55  | <0.001 | 2.61 | T |
|       | c.Srt90.bl | 1.74 | 0.58 | 145 |     |        |        |      |   |
|       | u.Srt90    | 1.75 | 0.58 | 145 | 144 | 27.55  | <0.001 | 2.61 | T |
|       | c.Srt90.bc | 1.70 | 0.56 | 145 |     |        |        |      |   |
| MRT90 | u.MRT90    | 1.63 | 0.56 | 145 | 144 | −26.31 | <0.001 | 2.61 | T |
|       | c.MRT90.nn | 1.64 | 0.57 | 145 |     |        |        |      |   |
|       | u.MRT90    | 1.63 | 0.56 | 145 | 144 | −26.31 | <0.001 | 2.61 | T |
|       | c.MRT90.bl | 1.67 | 0.59 | 145 |     |        |        |      |   |
|       | u.MRT90    | 1.63 | 0.56 | 145 | 144 | −26.31 | <0.001 | 2.61 | T |
|       | c.MRT90.bc | 1.64 | 0.57 | 145 |     |        |        |      |   |
| TDX90 | u.TDX90    | 1.87 | 0.62 | 145 | 144 | 28.59  | <0.001 | 2.61 | T |
|       | c.TDX90.nn | 1.79 | 0.57 | 145 |     |        |        |      |   |
|       | u.TDX90    | 1.87 | 0.62 | 145 | 144 | 28.59  | <0.001 | 2.61 | T |
|       | c.TDX90.bl | 1.82 | 0.59 | 145 |     |        |        |      |   |
|       | u.TDX90    | 1.87 | 0.62 | 145 | 144 | 28.59  | <0.001 | 2.61 | T |
|       | c.TDX90.bc | 1.79 | 0.57 | 145 |     |        |        |      |   |

u = uncorrected, c = corrected, nn = nearest neighbour, bl = bilinear, bc = bicubic, Ast30 = ASTER GDEM V3, Crt30 = CartoDEM v3.R1, Srt30 = SRTM.v3, Srt90 = SRTM.v4.1, MRT90 = MERIT DEM, TDX90 = TanDEM-X 90m,  $\bar{X}$  = mean, S2 = variance, N = no. of observations, df = degree of freedom, t Stat = t-statistic, t Critical two tail = two tail critical value of paired t-test at a confidence Level,  $P(F \leq f)$  two-tail = two tail probability distribution for paired t-test, CL = Level of confidence,  $\alpha$  = level of significance.

**Table S8.** Results of two tail F-test for variances of slope values (at 90%, 95% and 99% CL) carried out taking pairs of slope values over “uncorrected (u)” and “corrected (c)” DEM Slope rasters (Ast30, Crt30, and Srt30) at GCPs. Pairs are further grouped by the extraction of slope values using three interpolation methods; nearest neighbour (nn), bilinear (bl), and bicubic (bc) at GCPs.

| Slope from DEMs | Pair Name (slope) | $\bar{X}$ | S2   | N   | df  | Fstat | p-value | Confidence Interval ( FLT, FRT) |                         |                         | Diff. Statistically Significant |         |         |
|-----------------|-------------------|-----------|------|-----|-----|-------|---------|---------------------------------|-------------------------|-------------------------|---------------------------------|---------|---------|
|                 |                   |           |      |     |     |       |         | CL=0.90, $\alpha$ =0.10         | CL=0.95, $\alpha$ =0.05 | CL=0.99, $\alpha$ =0.01 | CL=0.90                         | CL=0.95 | CL=0.99 |
|                 |                   |           |      |     |     |       |         |                                 |                         |                         |                                 |         |         |
| Ast30           | u.Ast30           | 5.25      | 6.92 | 145 | 144 | 1.416 | 0.038   | (0.7595,1.3166)                 | (0.7204,1.3881)         | (0.6494,1.5399)         | Yes                             | Yes     | No      |
|                 | c.Ast30.nn        | 4.40      | 4.89 | 145 | 144 |       |         |                                 |                         |                         |                                 |         |         |
|                 | u.Ast30           | 5.25      | 6.92 | 145 | 144 | 1.426 | 0.034   | (0.7595,1.3166)                 | (0.7204,1.3881)         | (0.6494,1.5399)         | Yes                             | Yes     | No      |
|                 | c.Ast30.bl        | 4.39      | 4.86 | 145 | 144 |       |         |                                 |                         |                         |                                 |         |         |
|                 | u.Ast30           | 5.25      | 6.92 | 145 | 144 | 1.419 | 0.037   | (0.7595,1.3166)                 | (0.7204,1.3881)         | (0.6494,1.5399)         | Yes                             | Yes     | No      |
|                 | c.Ast30.bc        | 4.40      | 4.88 | 145 | 144 |       |         |                                 |                         |                         |                                 |         |         |

|       |            |      |      |     |     |       |       |                 |                 |                 |    |    |    |
|-------|------------|------|------|-----|-----|-------|-------|-----------------|-----------------|-----------------|----|----|----|
| Crt30 | u.Crt30    | 3.28 | 3.44 | 145 | 144 | 1.132 | 0.459 | (0.7595,1.3166) | (0.7204,1.3881) | (0.6494,1.5399) | No | No | No |
|       | c.Crt30.nn | 3.49 | 3.90 | 145 | 144 |       |       |                 |                 |                 |    |    |    |
|       | u.Crt30    | 3.28 | 3.44 | 145 | 144 | 1.119 | 0.501 | (0.7595,1.3166) | (0.7204,1.3881) | (0.6494,1.5399) | No | No | No |
|       | c.Crt30.bl | 3.47 | 3.85 | 145 | 144 |       |       |                 |                 |                 |    |    |    |
|       | u.Crt30    | 3.28 | 3.44 | 145 | 144 | 1.120 | 0.498 | (0.7595,1.3166) | (0.7204,1.3881) | (0.6494,1.5399) | No | No | No |
|       | c.Crt30.bc | 3.47 | 3.86 | 145 | 144 |       |       |                 |                 |                 |    |    |    |
| Srt30 | u.Srt30    | 2.72 | 1.62 | 145 | 144 | 1.085 | 0.624 | (0.7595,1.3166) | (0.7204,1.3881) | (0.6494,1.5399) | No | No | No |
|       | c.Srt30.nn | 2.62 | 1.49 | 145 | 144 |       |       |                 |                 |                 |    |    |    |
|       | u.Srt30    | 2.72 | 1.62 | 145 | 144 | 1.065 | 0.708 | (0.7595,1.3166) | (0.7204,1.3881) | (0.6494,1.5399) | No | No | No |
|       | c.Srt30.bl | 2.64 | 1.52 | 145 | 144 |       |       |                 |                 |                 |    |    |    |
|       | u.Srt30    | 2.72 | 1.62 | 145 | 144 | 1.085 | 0.624 | (0.7595,1.3166) | (0.7204,1.3881) | (0.6494,1.5399) | No | No | No |
|       | c.Srt30.bc | 2.62 | 1.49 | 145 | 144 |       |       |                 |                 |                 |    |    |    |

**Table S9.** Results of two tail F-test for variances of slope values (at 90%, 95% and 99% CL) carried out taking pairs of slope values over “uncorrected (u)”, and “corrected (c)” DEM Slope rasters (Srt90, MRT90, and TDX90) at GCPs. Pairs are further grouped by the extraction of slope values using three interpolation methods; nearest neighbour (nn), bilinear (bl), and bicubic (bc) at GCPs.

| Slope from DEMs | Pair Name (slope) | $\bar{X}$ | S2   | N   | df  | Fstat | p-value | Confidence Interval (FLT, FRT) |                   |                   | Diff. Statistically Significant |              |              |
|-----------------|-------------------|-----------|------|-----|-----|-------|---------|--------------------------------|-------------------|-------------------|---------------------------------|--------------|--------------|
|                 |                   |           |      |     |     |       |         | CL=0.90, $\alpha$              | CL=0.95, $\alpha$ | CL=0.99, $\alpha$ | CL=0.9CL=0.9                    | CL=0.9CL=0.9 | CL=0.9CL=0.9 |
|                 |                   |           |      |     |     |       |         | =0.10                          | =0.05             | =0.01             | 0                               | 5            | 9            |
| Srt90           | u.Srt90           | 1.75      | 0.58 | 145 | 144 | 1.053 | 0.759   | (0.7595,1.3166)                | (0.7204,1.3881)   | (0.6494,1.5399)   | No                              | No           | No           |
|                 | c.Srt90.nn        | 1.70      | 0.56 | 145 | 144 |       |         |                                |                   |                   |                                 |              |              |
|                 | u.Srt90           | 1.75      | 0.58 | 145 | 144 | 1.010 | 0.953   | (0.7595,1.3166)                | (0.7204,1.3881)   | (0.6494,1.5399)   | No                              | No           | No           |
|                 | c.Srt90.bl        | 1.74      | 0.58 | 145 | 144 |       |         |                                |                   |                   |                                 |              |              |
|                 | u.Srt90           | 1.75      | 0.58 | 145 | 144 | 1.048 | 0.777   | (0.7595,1.3166)                | (0.7204,1.3881)   | (0.6494,1.5399)   | No                              | No           | No           |
|                 | c.Srt90.bc        | 1.70      | 0.56 | 145 | 144 |       |         |                                |                   |                   |                                 |              |              |
| MRT90           | u.MRT90           | 1.63      | 0.56 | 145 | 144 | 1.019 | 0.910   | (0.7595,1.3166)                | (0.7204,1.3881)   | (0.6494,1.5399)   | No                              | No           | No           |
|                 | c.MRT90.nn        | 1.64      | 0.57 | 145 | 144 |       |         |                                |                   |                   |                                 |              |              |
|                 | u.MRT90           | 1.63      | 0.56 | 145 | 144 | 1.054 | 0.753   | (0.7595,1.3166)                | (0.7204,1.3881)   | (0.6494,1.5399)   | No                              | No           | No           |
|                 | c.MRT90.bl        | 1.67      | 0.59 | 145 | 144 |       |         |                                |                   |                   |                                 |              |              |
|                 | u.MRT90           | 1.63      | 0.56 | 145 | 144 | 1.019 | 0.912   | (0.7595,1.3166)                | (0.7204,1.3881)   | (0.6494,1.5399)   | No                              | No           | No           |
|                 | c.MRT90.bc        | 1.64      | 0.57 | 145 | 144 |       |         |                                |                   |                   |                                 |              |              |
| TDX90           | u.TDX90           | 1.87      | 0.62 | 145 | 144 | 1.098 | 0.576   | (0.7595,1.3166)                | (0.7204,1.3881)   | (0.6494,1.5399)   | No                              | No           | No           |
|                 | c.TDX90.nn        | 1.79      | 0.57 | 145 | 144 |       |         |                                |                   |                   |                                 |              |              |
|                 | u.TDX90           | 1.87      | 0.62 | 145 | 144 | 1.057 | 0.742   | (0.7595,1.3166)                | (0.7204,1.3881)   | (0.6494,1.5399)   | No                              | No           | No           |
|                 | c.TDX90.bl        | 1.82      | 0.59 | 145 | 144 |       |         |                                |                   |                   |                                 |              |              |
|                 | u.TDX90           | 1.87      | 0.62 | 145 | 144 | 1.098 | 0.576   | (0.7595,1.3166)                | (0.7204,1.3881)   | (0.6494,1.5399)   | No                              | No           | No           |
|                 | c.TDX90.bc        | 1.79      | 0.57 | 145 | 144 |       |         |                                |                   |                   |                                 |              |              |

u = uncorrected, c = corrected, nn = nearest neighbour, bl = bilinear, bc = bicubic, Srt90 = SRTM.v4.1, MRT90= MERIT DEM, TDX90=TanDEM-X 90m,  $\bar{X}$  = mean, S2 = variance, N= no. of observations, df= degree of freedom, Fstat = F-statistic, FLT = F-critical at left tail, FRT = F-critical at right tail, P(F<=f) two-tail= two tail probability distribution for F-Test, CL = Level of confidence,  $\alpha$  = level of significance.

## Supplementary Figures

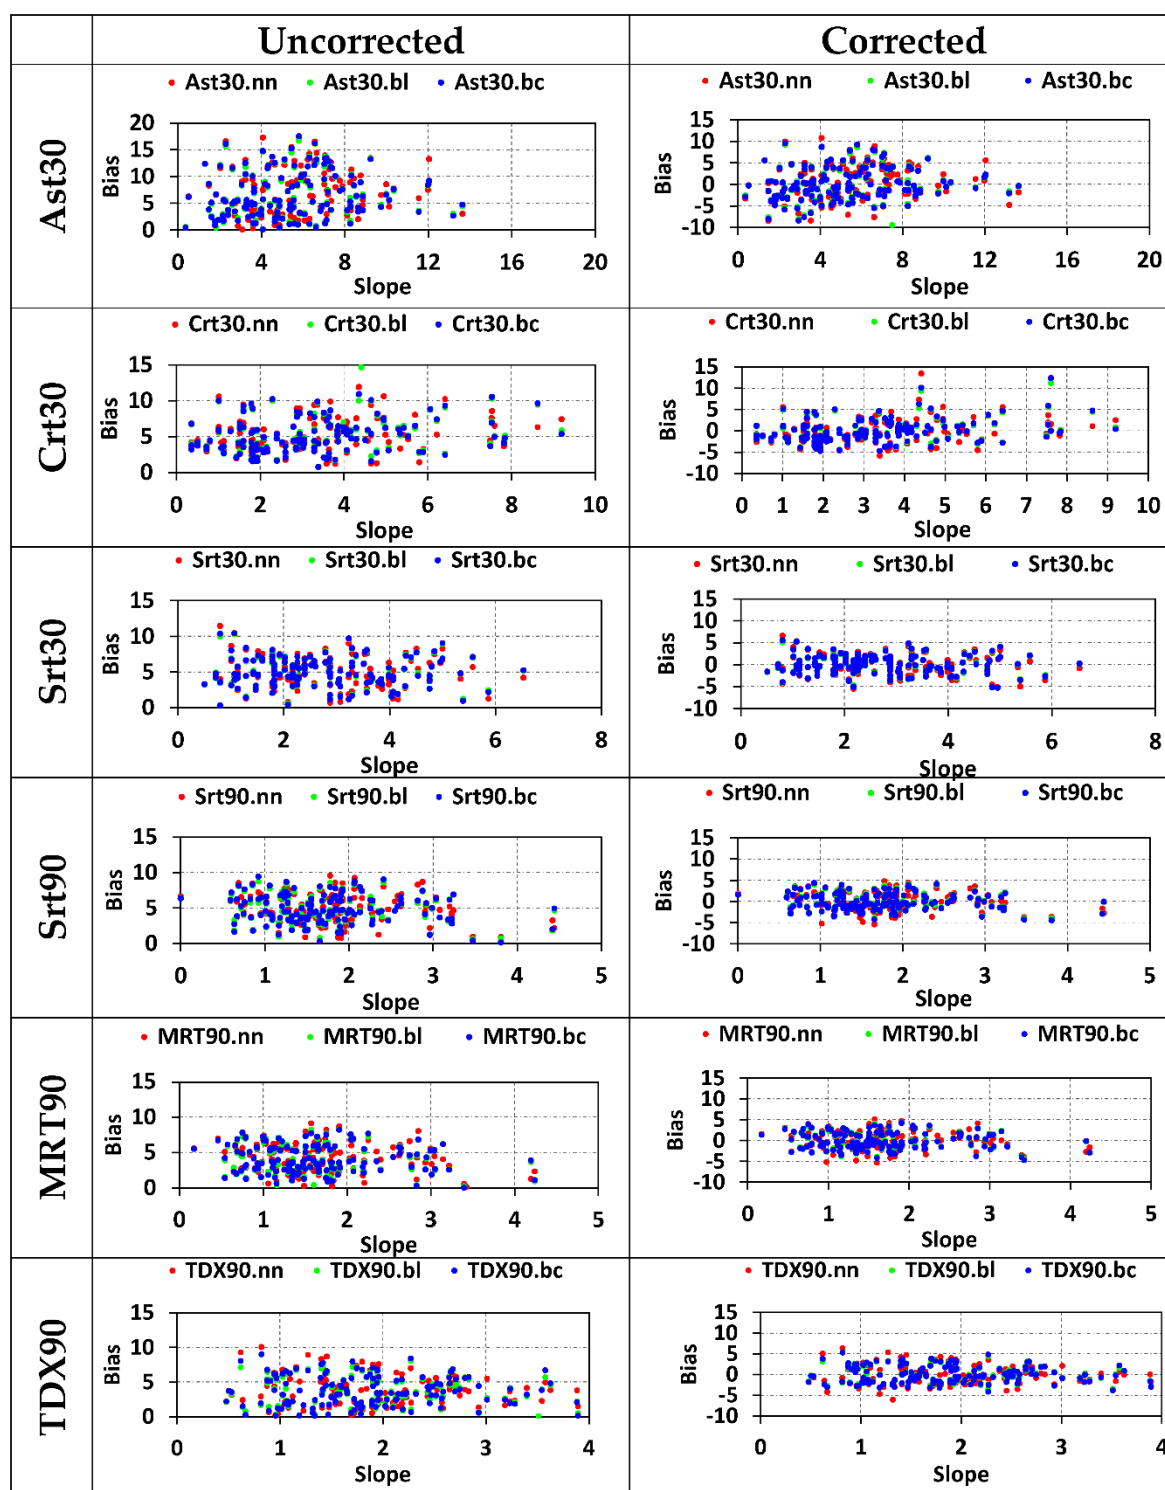

**Figure S1.** The variation of bias (for uncorrected and corrected space borne elevation data sets with respect to DGPS values over GCPs) with changes in slope of the surface over the study region. The reduction in bias and randomly distributed bias values across the range of slope is visible in corrected space borne elevation data sets (Ast30 = ASTER GDEM V3, Crt30 = CartoDEM v3.R1, Srt30 = SRTM.v3, Srt90 = SRTM.v4.1, MRT90= MERIT DEM, TDX90=TanDEM-X 90m) compared to the corresponding uncorrected dataset.



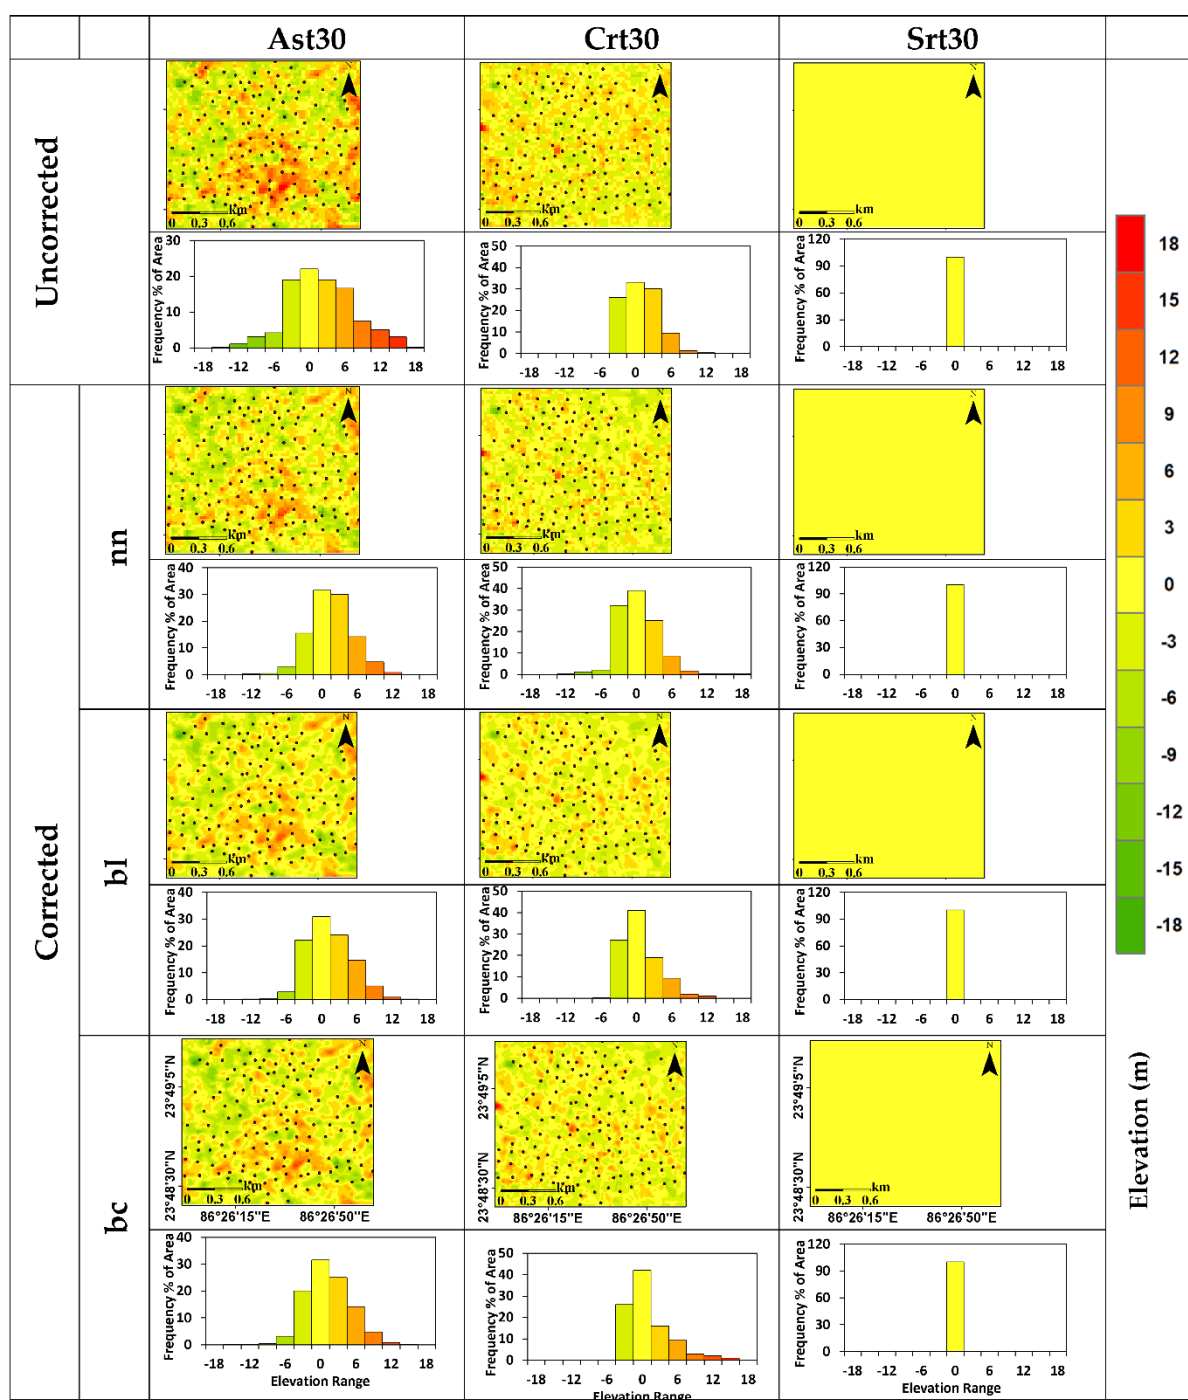

**Figure S2.** The differences of elevation map (DEM-Srt30) of the study area and corresponding histogram (Frequency (% of area)) exhibiting difference of elevation in space borne elevation data sets before and after correction where Srt30 (SRTM at 30m) is taken as base for comparison. The nn, bl, and bc refers to the interpolation methods. (Ast30 = ASTER GDEM V3, Crt30 = CartoDEM v3.R1, Srt30 = SRTM.v3 at 30m grid).

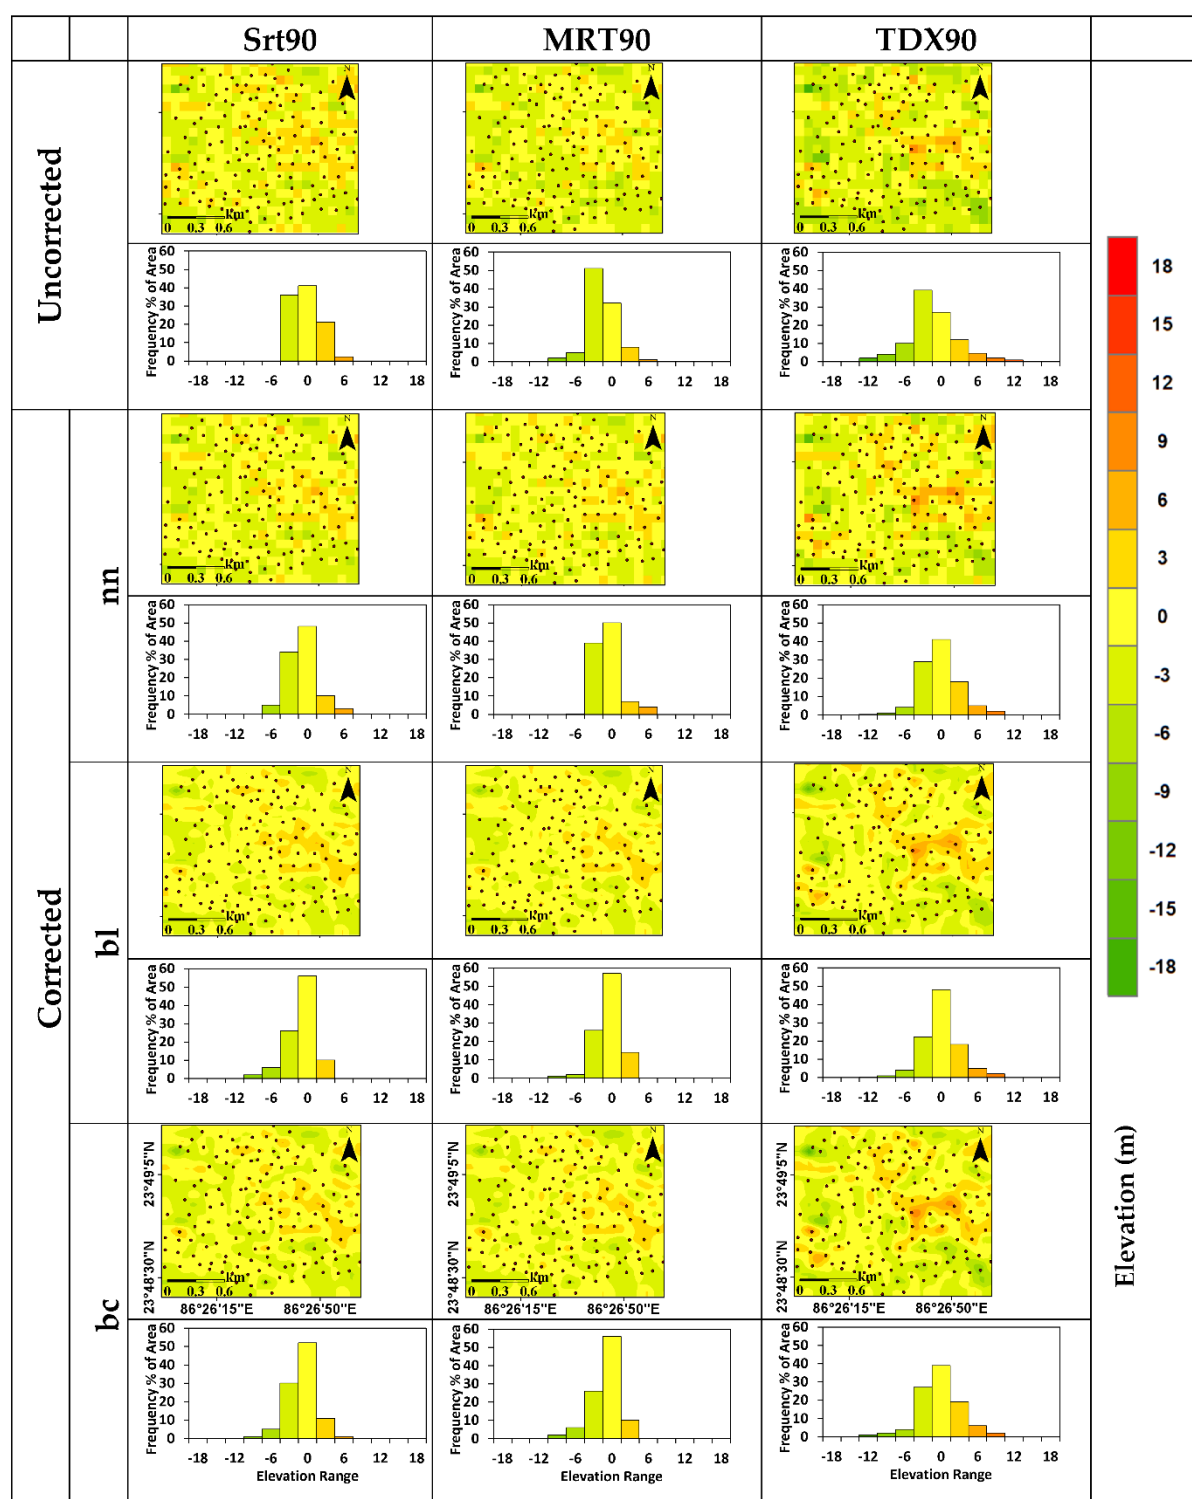

**Figure S3.** The differences of elevation map (DEM-Srt30) of the study area and corresponding histogram (Frequency (% of area)) exhibiting difference of elevation in space borne elevation data sets before and after correction where Srt30 (SRTM at 30m) is taken as base for comparison. The nn, bl, and bc refers to the interpolation methods. (Srt90 = SRTM.v4.1, MRT90= MERIT DEM, TDX90=TanDEM-X at 90m grid).

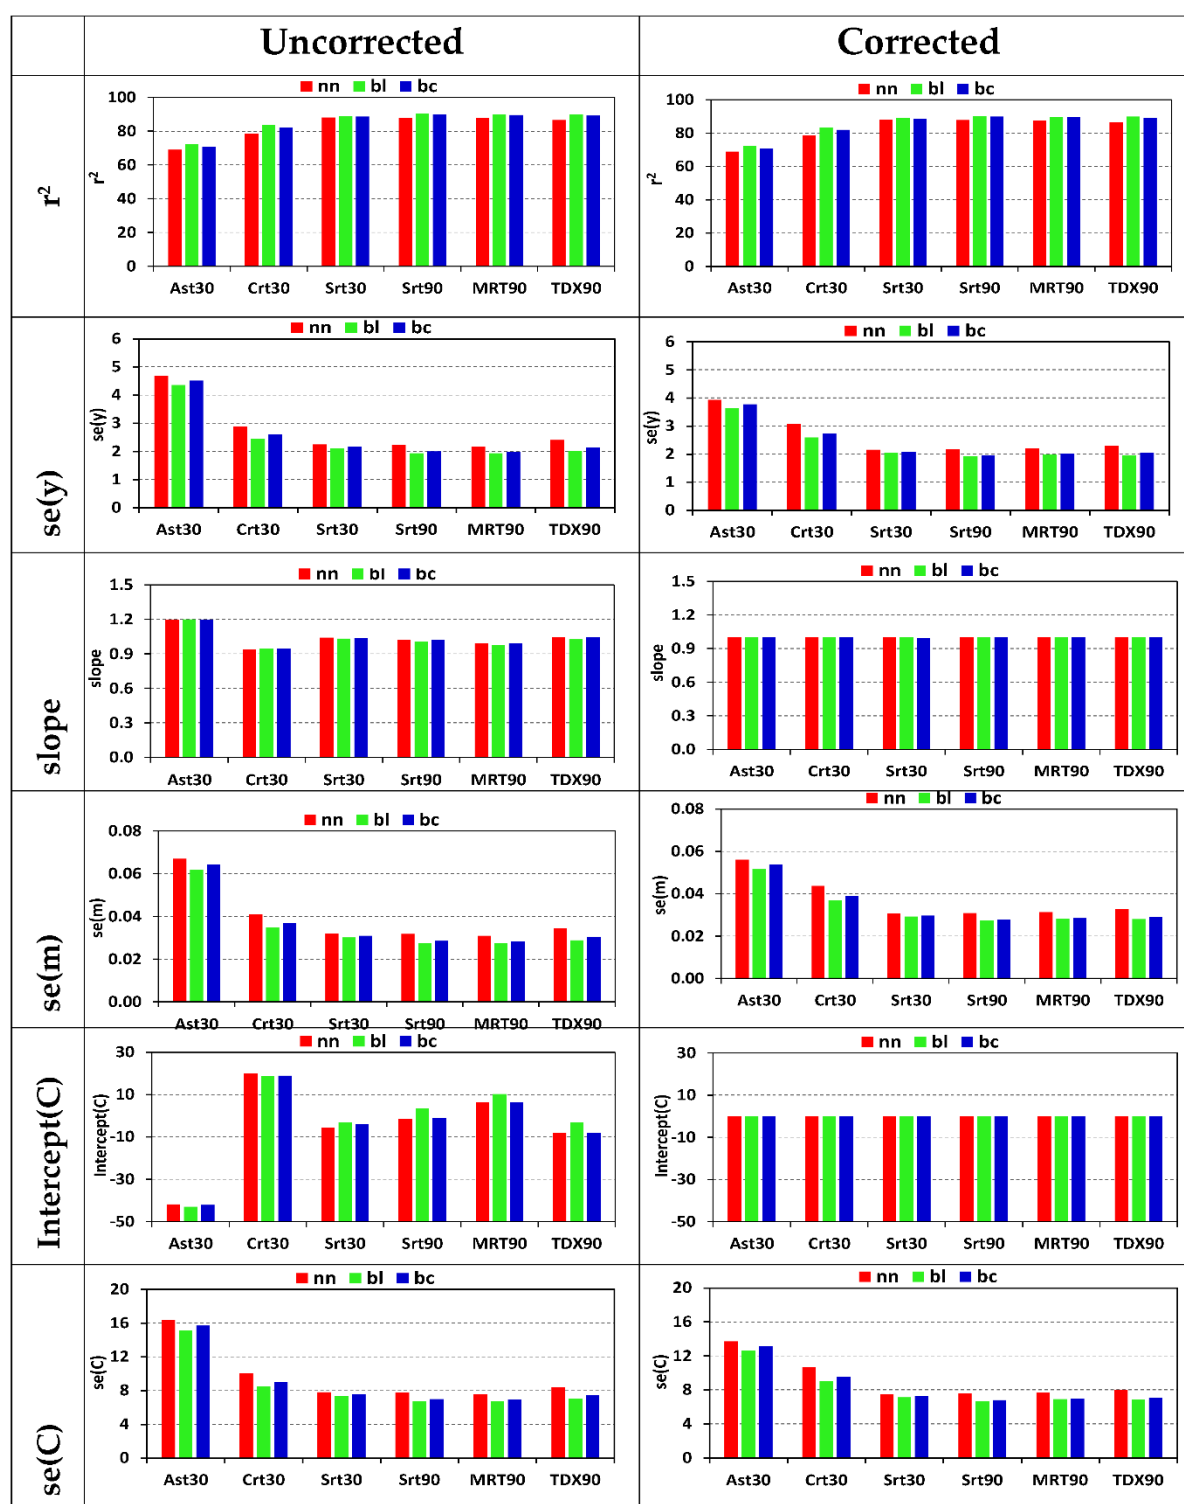

**Figure S4.** The correlation statistics (the coefficient of determination ( $r^2$ ), the standard error for the y estimate ( $se(y)$ ), slope (m), intercept (C), and the standard error value for the constant ( $se(C)$ )) based on the linear fit for uncorrected or corrected space borne elevation data sets (Ast30 = ASTER GDEM V3, Crt30 = CartoDEM v3.R1, Srt30 = SRTM.v3, Srt90 = SRTM.v4.1, MRT90= MERIT DEM, TDX90=TanDEM-X 90m) with respect to DGPS values at the GCPs. The nn, bl, and bc refers to the interpolation methods.

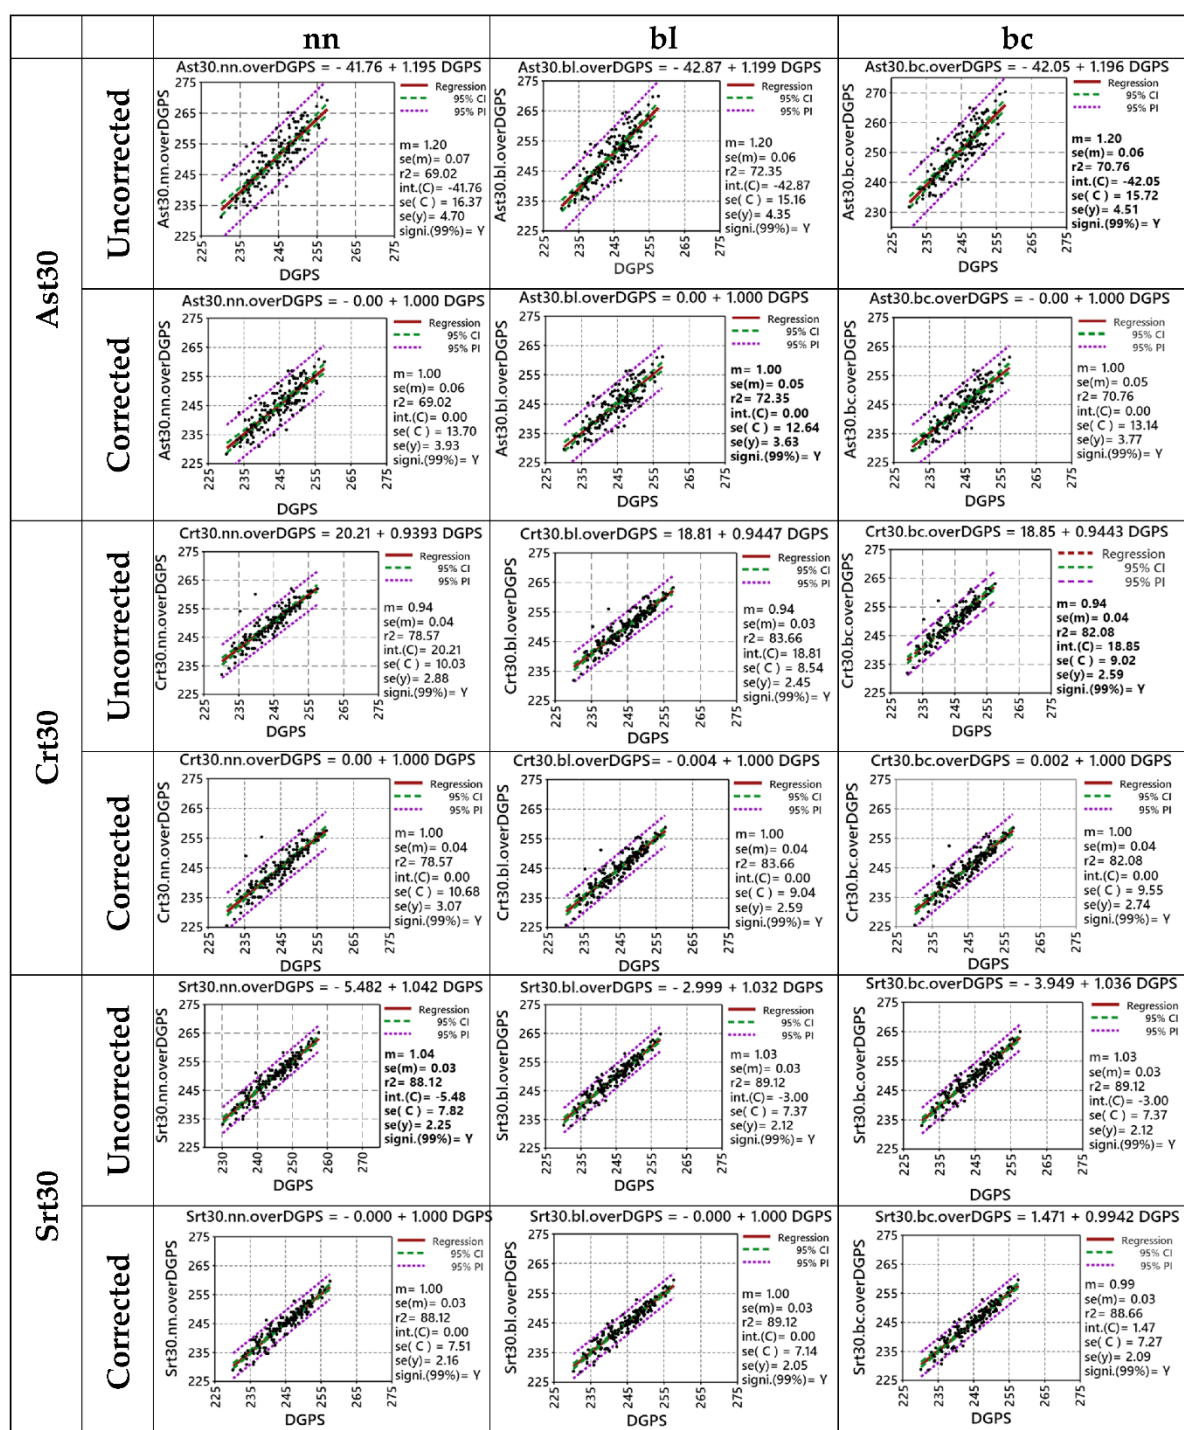

**Figure S5.** Scatter plot showing correlation statistics using elevation values from uncorrected space borne elevation data sets (Ast30 = ASTER GDEM V3, Crt30 = CartoDEM v3.R1, Srt30 = SRTM.v3) with respect to DGPS values over the GCPs. The nn, bl, and bc refers to the interpolation methods.

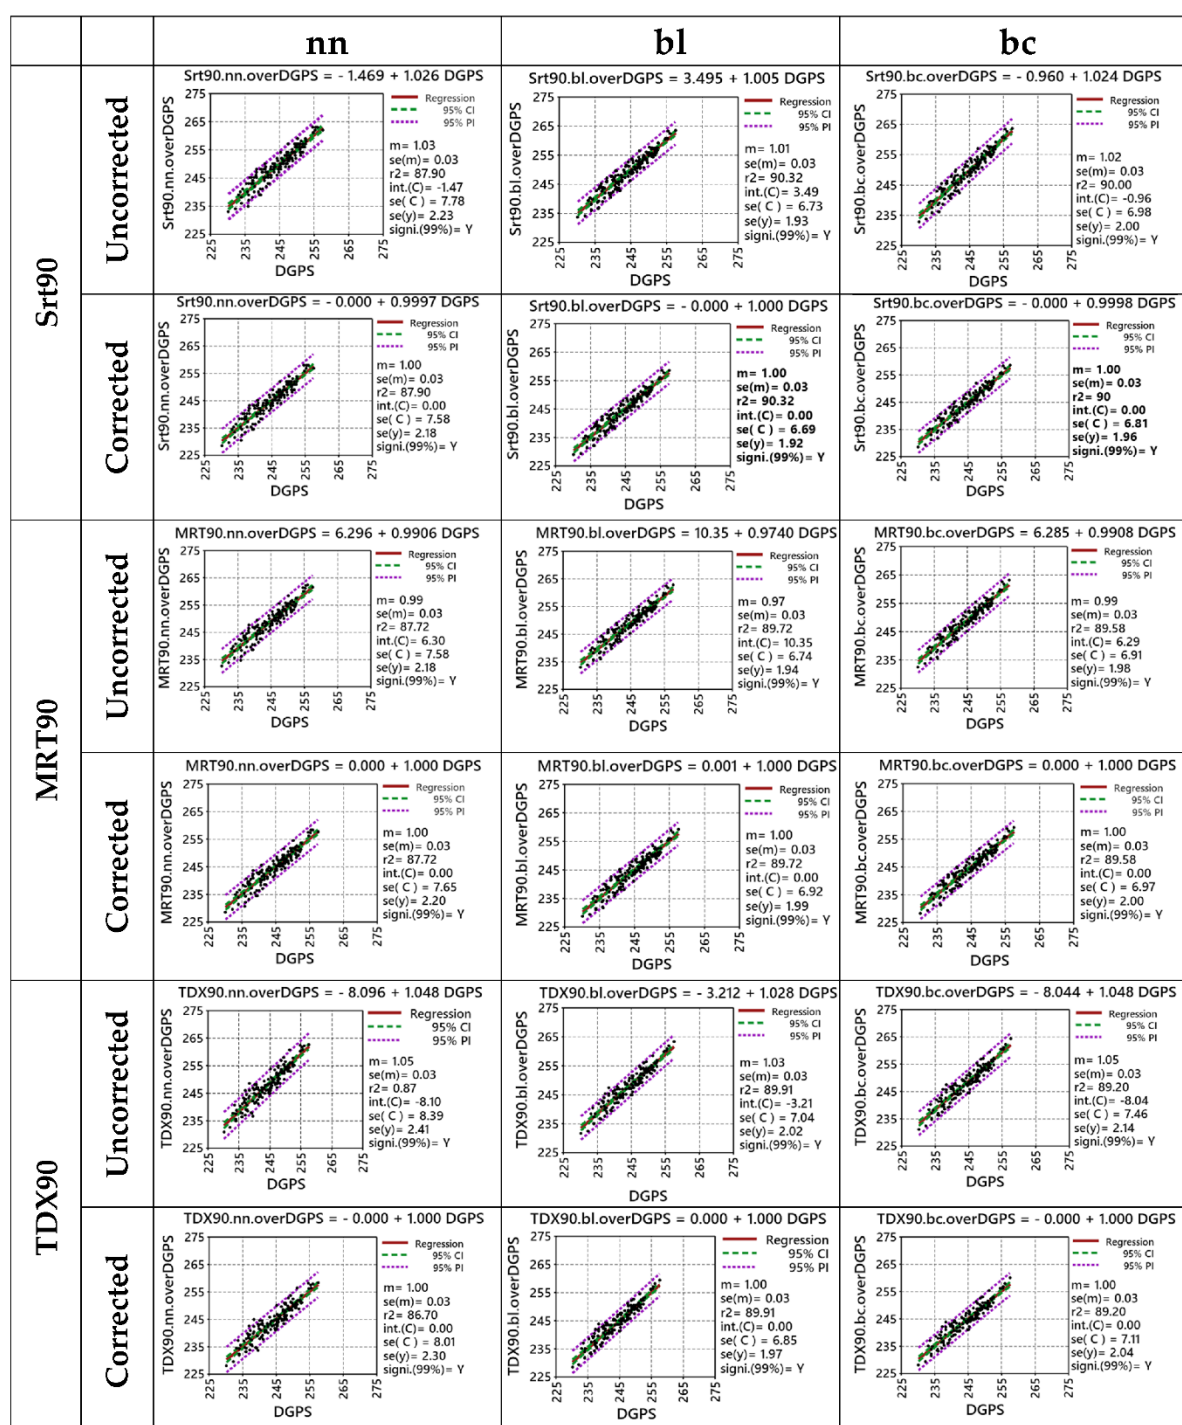

**Figure S6.** Scatter plot showing correlation statistics using elevation values from corrected space borne elevation data sets (Srt90 = SRTM.v4.1, MRT90= MERIT DEM, TDX90= TanDEM-X 90m) with respect to DGPS values over the GCPs. The nn, bl, and bc refers to the interpolation methods.



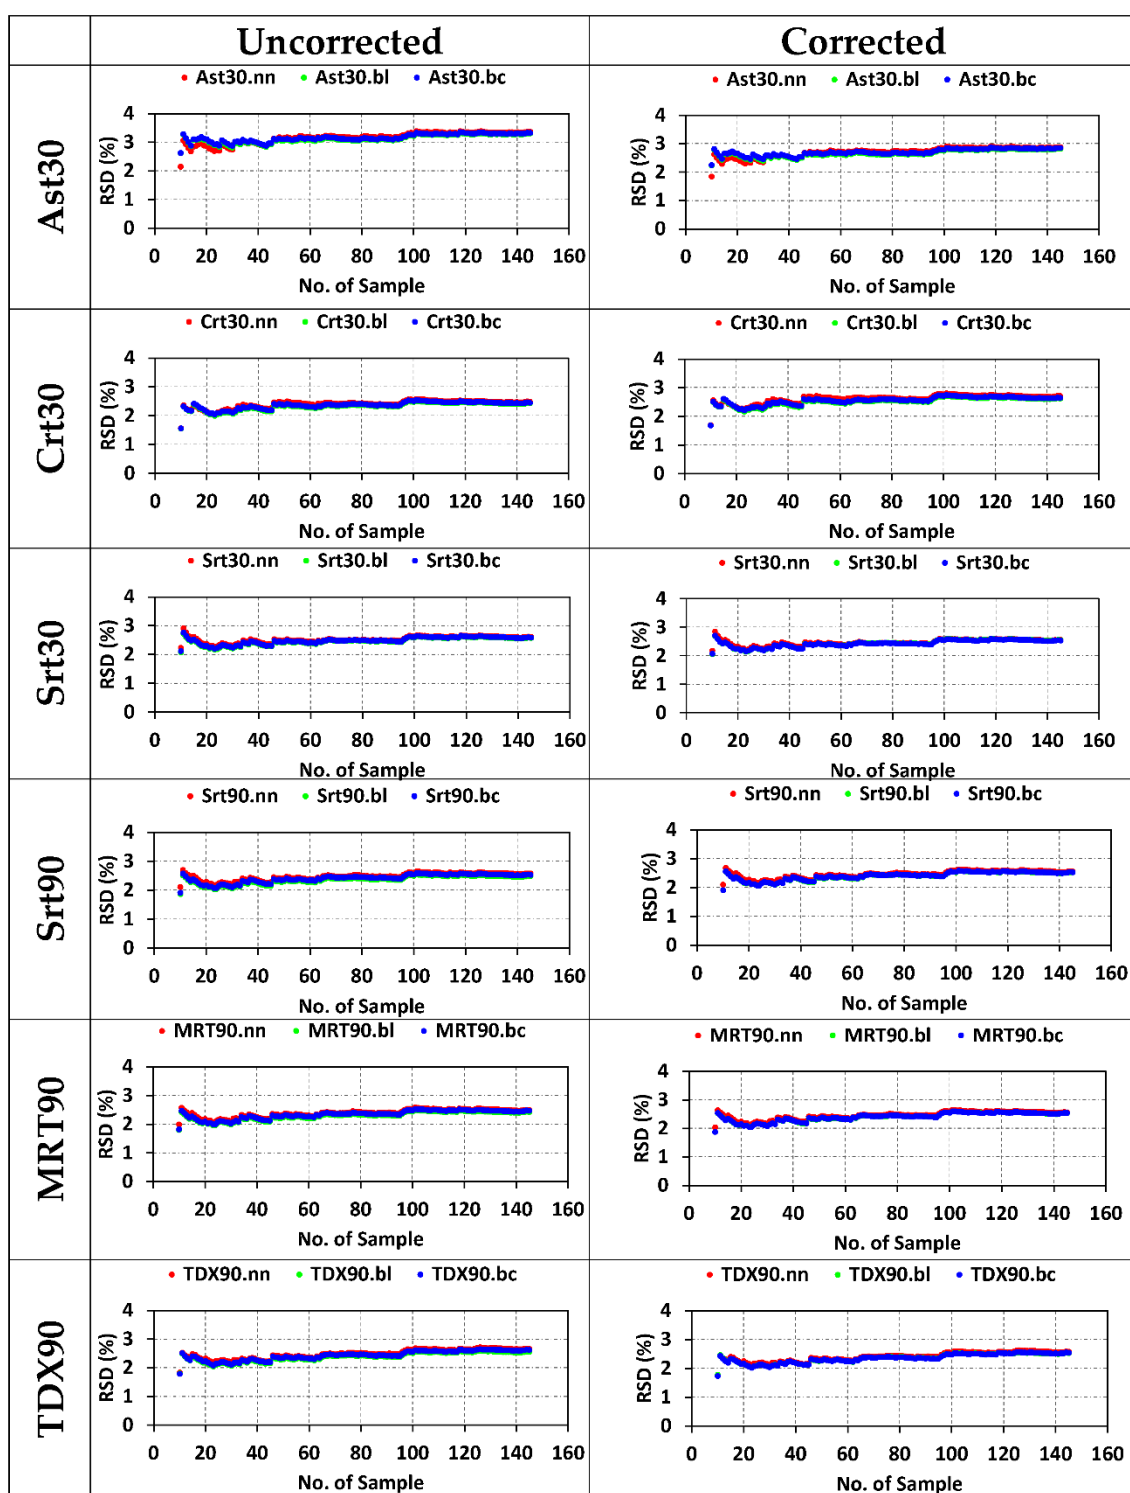

**Figure S7.** The variation in the calculated values of relative standard deviation (RSD in %) with increasing number of GCPs (randomly selected) exhibit stabilization of values at around 60 (for 60–145 no. of GCPs). There is a minor change in RSD% for corrected space borne elevation data sets. The nn, bl, and bc refers to the interpolation methods. (Ast30 = ASTER GDEM V3, Crt30 = CartoDEM v3.R1, Srt30 = SRTM.v3, Srt90 = SRTM.v4.1, MRT90 = MERIT DEM, TDX90 = TanDEM-X 90m).
